# Supplementary material for: Feature selection in molecular graph neural networks based on quantum chemical approaches
Source: Royal Society of Chemistry journal article supplement (doi:10.1039/d3dd00010a), 2023-01-01
Supplement: d3dd00010a1.pdf [file d3dd00010a1.pdf]

————— *Supporting Information* —————

**Feature selection in molecular graph neural  
networks based on quantum chemical approaches**

---

Daisuke Yokogawa\* and Kayo Suda

*Graduate School of Arts and Sciences, The University of Tokyo, 3-8-1 Komaba, Meguro-ku,  
Tokyo 153-8902, Japan*

E-mail: c-d.yokogawa@g.ecc.u-tokyo.ac.jp

## Supplementary Figures and Table

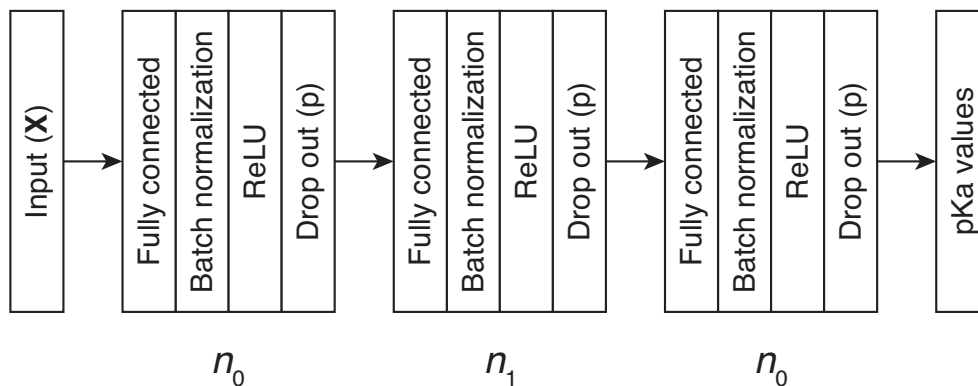

Figure S1: Details of machine learning process

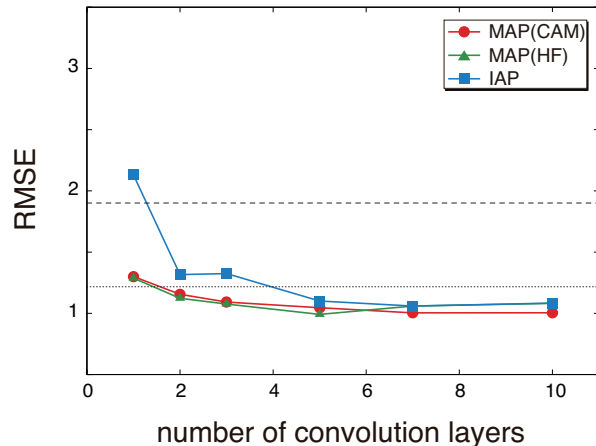

Figure S2: Root mean square errors (RMSEs) of the pKa values obtained by IGC and two types of atom features (IAP and MAP) with different number of convolution layers (1, 2, 3, 5, 7, and 10). The MAPs were computed at CAM-B3LYP/aug-cc-pVDZ level (CAM) and Hartree-Fock/6-31G\*\* level (HF). For comparison, the RMSEs computed with MolGpka and OPERA are also shown with black dashed and dotted lines, respectively.

Table S1: Comparison between experimental and calculated pKa values. In the cases of important graph convolution (IGC), simple graph convolution (SGC), and simple graph convolution network (SGCN), the data were computed with ten convolution layers ( $L = 10$ ).

| CAS No.     | exp.  | MolGpKa | OPERA | IGC   |       | SGC   |       | SGCN |
|-------------|-------|---------|-------|-------|-------|-------|-------|------|
|             |       |         |       | MAP   | IAP   | MAP   | IAP   | MAP  |
| 617-97-0    | -6.56 | -6.73   | 0.58  | -6.64 | -4.58 | -4.97 | -4.82 | 4.36 |
| 463-56-9    | 0.85  | 3.75    | 6.60  | 4.12  | 2.33  | 2.25  | 2.42  | 2.47 |
| 5515-35-5   | 1.00  | 4.08    | 5.06  | 3.16  | 3.99  | 2.12  | 7.29  | 4.03 |
| 3112-46-7   | 1.34  | 1.75    | 1.24  | 1.75  | 1.85  | 2.22  | 1.74  | 2.68 |
| 38876-67-4  | 1.37  | 1.64    | 1.47  | 2.13  | 2.20  | 1.98  | 2.13  | 4.48 |
| 151-01-9    | 1.79  | 1.90    | 8.46  | 2.15  | 2.62  | 2.85  | 2.71  | 2.64 |
| 1199-67-3   | 1.86  | 1.39    | 1.02  | 0.47  | 1.49  | 1.08  | 1.29  | 1.81 |
| 6795-92-2   | 1.89  | 1.80    | 1.28  | 1.97  | 2.48  | 2.03  | 1.51  | 4.64 |
| 89324-43-6  | 1.94  | 1.75    | 2.04  | 2.49  | 2.78  | 3.05  | 2.03  | 8.34 |
| 99-60-5     | 1.96  | 2.36    | 2.06  | 2.28  | 2.92  | 2.17  | 3.11  | 2.56 |
| 1321-11-5   | 2.08  | 10.75   | 2.76  | 4.16  | 3.92  | 4.23  | 3.63  | 4.02 |
| 204326-31-8 | 2.13  | 3.25    | 3.96  | 3.83  | 3.15  | 3.15  | 5.44  | 5.80 |
| 2566-34-9   | 2.20  | 3.21    | 2.30  | 3.32  | 4.17  | 3.97  | 4.50  | 8.78 |
| 5683-31-8   | 2.21  | 2.23    | 3.54  | 2.54  | 4.19  | 2.65  | 3.21  | 5.07 |
| 552-16-9    | 2.23  | 2.51    | 2.49  | 2.86  | 2.85  | 2.68  | 3.02  | 3.72 |
| 601-99-0    | 2.24  | 6.47    | 2.34  | -0.14 | 2.98  | 2.12  | 2.39  | 2.97 |
| 637-44-5    | 2.26  | 2.03    | 2.36  | 2.85  | 2.83  | 3.32  | 2.24  | 3.29 |
| 6787-46-8   | 2.51  | 3.77    | 2.61  | 3.27  | 3.03  | 3.24  | 3.34  | 3.59 |
| 74893-46-2  | 2.55  | 2.17    | 2.44  | 2.91  | 2.90  | 3.02  | 2.56  | 3.39 |
| 1483-67-6   | 2.61  | 2.17    | 2.71  | 2.99  | 2.77  | 3.15  | 2.54  | 4.48 |
| 590-93-2    | 2.63  | 2.14    | 2.73  | 3.07  | 3.01  | 3.05  | 2.57  | 3.54 |
| 80220-95-7  | 2.67  | 1.93    | 2.57  | 2.88  | 2.84  | 3.22  | 2.30  | 3.94 |
| 90259-31-7  | 2.71  | 2.30    | 2.42  | 2.69  | 2.76  | 2.89  | 2.96  | 4.94 |

| CAS No.     | exp. | MolGpKa | OPERA | IGC  |      | SGC  |      | SGCN  |
|-------------|------|---------|-------|------|------|------|------|-------|
|             |      |         |       | MAP  | IAP  | MAP  | IAP  | MAP   |
| 769-40-4    | 2.75 | 1.91    | 6.04  | 4.40 | 4.24 | 4.22 | 2.74 | 4.58  |
| 40991-34-2  | 2.76 | 3.00    | 2.86  | 3.02 | 2.59 | 3.10 | 2.45 | 3.35  |
| 1975-51-5   | 2.91 | 3.53    | 3.01  | 3.11 | 3.58 | 2.95 | 3.89 | 2.76  |
| 54045-76-0  | 2.96 | 3.03    | 3.06  | 2.93 | 2.86 | 2.79 | 2.59 | 4.93  |
| 594-58-1    | 2.97 | 2.43    | 3.79  | 2.78 | 4.34 | 3.30 | 4.26 | 6.32  |
| 2164-61-6   | 3.00 | 2.59    | 2.90  | 2.87 | 2.44 | 3.30 | 2.22 | 5.59  |
| 6967-82-4   | 3.00 | 2.81    | 3.06  | 3.05 | 2.88 | 3.34 | 3.02 | 6.20  |
| 849067-18-1 | 3.10 | 4.77    | 1.06  | 2.72 | 3.11 | 3.03 | 3.27 | 3.13  |
| 133232-68-5 | 3.17 | 2.73    | 2.96  | 3.40 | 3.21 | 3.24 | 3.70 | 3.06  |
| 6345-67-1   | 3.22 | 2.54    | 2.45  | 2.90 | 3.12 | 2.54 | 3.31 | 3.22  |
| 866-32-0    | 3.22 | 3.12    | 3.12  | 3.59 | 3.41 | 3.86 | 3.34 | 2.85  |
| 632-46-2    | 3.23 | 3.38    | 3.47  | 3.90 | 3.71 | 4.13 | 3.97 | 4.28  |
| 6319-40-0   | 3.24 | 3.01    | 3.14  | 3.23 | 3.12 | 2.74 | 3.54 | 3.33  |
| 59337-97-2  | 3.30 | 8.09    | 3.20  | 2.60 | 3.17 | 2.28 | 3.11 | 3.06  |
| 453-71-4    | 3.37 | 3.06    | 3.47  | 3.37 | 3.22 | 3.36 | 3.62 | 3.67  |
| 32821-75-3  | 3.38 | 3.12    | 3.49  | 3.47 | 3.43 | 3.29 | 3.47 | 3.80  |
| 77133-27-8  | 3.41 | 3.31    | 3.31  | 3.61 | 3.19 | 3.47 | 3.44 | 4.08  |
| 2604-45-7   | 3.43 | 3.27    | 3.53  | 3.66 | 3.31 | 3.95 | 3.89 | 4.93  |
| 6926-49-4   | 3.44 | 3.88    | 3.67  | 3.45 | 3.73 | 3.76 | 3.91 | 4.10  |
| 50907-33-0  | 3.45 | 3.88    | 3.54  | 3.37 | 3.89 | 3.40 | 3.89 | 3.50  |
| 90259-35-1  | 3.51 | 3.22    | 3.41  | 3.63 | 3.42 | 3.89 | 3.33 | 11.89 |
| 4607-38-9   | 3.53 | 11.80   | 3.56  | 3.23 | 3.74 | 3.07 | 3.99 | 5.40  |
| 71515-74-7  | 3.55 | 3.85    | 3.84  | 3.82 | 3.75 | 3.60 | 3.84 | 3.85  |
| 56-91-7     | 3.59 | 3.97    | 3.69  | 4.47 | 4.09 | 4.38 | 3.99 | 3.38  |
| 14778-29-1  | 3.60 | n/a     | n/a   | 5.06 | 7.10 | 5.55 | 5.44 | 4.30  |
| 636-76-0    | 3.61 | 8.93    | 3.71  | 3.84 | 3.51 | 3.65 | 3.81 | 3.59  |

| CAS No.     | exp. | MolGpKa | OPERA | IGC  |      | SGC  |      | SGCN |
|-------------|------|---------|-------|------|------|------|------|------|
|             |      |         |       | MAP  | IAP  | MAP  | IAP  | MAP  |
| 85-55-2     | 3.64 | 3.67    | 3.74  | 3.71 | 3.35 | 3.90 | 3.49 | 4.42 |
| 168902-34-9 | 3.66 | 3.48    | 3.56  | 3.39 | 3.64 | 3.43 | 3.64 | 4.03 |
| 50907-46-5  | 3.69 | 3.80    | 4.17  | 4.16 | 4.16 | 3.92 | 3.70 | 4.36 |
| 19182-29-7  | 3.70 | 1.60    | 3.60  | 1.82 | 2.02 | 2.73 | 2.51 | 4.63 |
| 603-79-2    | 3.73 | 3.76    | 3.83  | 4.06 | 3.72 | 4.13 | 3.98 | 3.76 |
| 88-97-1     | 3.75 | 9.46    | 4.00  | 3.53 | 3.13 | 3.69 | 3.45 | 4.24 |
| 102606-33-7 | 3.79 | 3.80    | 3.69  | 4.11 | 3.78 | 4.26 | 3.98 | 3.86 |
| 3440-99-1   | 3.82 | 3.88    | 3.99  | 3.72 | 3.51 | 3.77 | 3.86 | 3.92 |
| 612-20-4    | 3.84 | 3.79    | 3.94  | 3.37 | 3.95 | 3.50 | 3.85 | 4.23 |
| 112868-41-4 | 3.86 | 3.76    | 3.76  | 4.14 | 3.77 | 4.07 | 3.80 | 3.59 |
| 23384-04-5  | 3.90 | 3.23    | 4.00  | 4.87 | 4.03 | 4.89 | 3.72 | 4.61 |
| 25567-10-6  | 3.92 | 3.86    | 3.89  | 4.07 | 4.00 | 4.12 | 4.01 | 3.87 |
| 3739-38-6   | 3.95 | 4.23    | 4.05  | 3.92 | 3.76 | 3.94 | 3.81 | 4.26 |
| 5732-10-5   | 3.96 | 3.18    | 3.86  | 4.02 | 3.93 | 3.70 | 3.99 | 4.26 |
| 6336-70-5   | 4.02 | 11.25   | 4.12  | 4.31 | 3.77 | 4.20 | 3.94 | 3.87 |
| 127340-37-8 | 4.03 | 4.36    | 4.13  | 4.08 | 4.01 | 3.92 | 3.73 | 5.42 |
| 594-61-6    | 4.04 | 2.84    | 4.17  | 2.54 | 3.94 | 3.50 | 4.25 | 4.50 |
| 529-75-9    | 4.05 | 3.77    | 4.15  | 4.33 | 3.46 | 4.32 | 3.42 | 4.04 |
| 586-38-9    | 4.06 | 4.08    | 3.99  | 4.08 | 3.76 | 4.08 | 3.83 | 3.35 |
| 50685-26-2  | 4.09 | 3.91    | 4.11  | 4.06 | 3.92 | 3.85 | 3.99 | 3.51 |
| 1642-81-5   | 4.13 | 3.93    | 4.03  | 4.14 | 3.93 | 4.07 | 3.98 | 4.38 |
| 3780-93-6   | 4.15 | n/a     | 4.25  | 7.08 | 5.73 | 5.42 | 5.69 | 5.46 |
| 88550-26-9  | 4.16 | 13.51   | 4.56  | 3.43 | 4.32 | 3.60 | 4.17 | 7.88 |
| 621-51-2    | 4.17 | 4.08    | 4.12  | 4.26 | 3.77 | 4.14 | 3.83 | 3.69 |
| 1123-28-0   | 4.18 | 13.46   | 4.21  | 3.91 | 4.01 | 3.66 | 4.31 | 4.53 |
| 134-11-2    | 4.18 | 3.77    | 4.08  | 4.28 | 3.63 | 4.34 | 3.40 | 3.86 |

| CAS No.     | exp. | MolGpKa | OPERA | IGC  |      | SGC  |      | SGCN |
|-------------|------|---------|-------|------|------|------|------|------|
|             |      |         |       | MAP  | IAP  | MAP  | IAP  | MAP  |
| 93-09-4     | 4.20 | 3.95    | 3.93  | 4.35 | 3.87 | 4.19 | 3.92 | 4.09 |
| 6926-51-8   | 4.23 | 3.88    | 4.33  | 4.42 | 3.95 | 4.97 | 3.91 | 4.79 |
| 63635-26-7  | 4.24 | 3.73    | 4.19  | 4.33 | 3.71 | 4.39 | 3.38 | 4.08 |
| 93351-38-3  | 4.25 | 4.08    | 4.15  | 4.25 | 3.79 | 4.14 | 3.83 | 3.72 |
| 5651-47-8   | 4.27 | 3.99    | 4.17  | 3.81 | 4.04 | 4.03 | 3.98 | 3.76 |
| 1129-06-2   | 4.28 | 4.10    | 4.32  | 4.30 | 3.87 | 4.18 | 3.98 | 3.90 |
| 99-04-7     | 4.28 | 3.93    | 4.24  | 4.15 | 3.74 | 4.23 | 4.00 | 3.92 |
| 25022-55-3  | 4.30 | 3.35    | 4.20  | 3.89 | 3.42 | 3.85 | 2.97 | 4.09 |
| 88550-27-0  | 4.31 | 2.66    | 4.21  | 4.43 | 4.25 | 4.34 | 4.17 | 6.37 |
| 61363-71-1  | 4.34 | 6.27    | 5.52  | 4.37 | 5.55 | 4.49 | 8.73 | 7.41 |
| 634-97-9    | 4.35 | 14.18   | 4.45  | 4.37 | 4.19 | 4.35 | 3.40 | 4.16 |
| 723-47-7    | 4.40 | 11.26   | 4.50  | 6.62 | 5.68 | 6.17 | 4.79 | 6.35 |
| 20044-86-4  | 4.46 | 4.83    | 4.36  | 4.63 | 4.99 | 4.79 | 4.29 | 3.76 |
| 30762-00-6  | 4.48 | 4.17    | 4.19  | 4.65 | 4.09 | 4.50 | 3.93 | 4.22 |
| 103323-97-3 | 4.54 | 4.15    | 4.64  | 3.87 | 4.03 | 4.29 | 3.91 | 3.25 |
| 15058-72-7  | 4.55 | 4.63    | 4.65  | 5.06 | 3.93 | 4.33 | 3.28 | 6.51 |
| 13205-46-4  | 4.57 | 4.17    | 4.67  | 4.60 | 4.12 | 4.60 | 3.93 | 4.28 |
| 873376-02-4 | 4.59 | 3.66    | 3.90  | 4.49 | 3.99 | 4.31 | 4.53 | 4.93 |
| 5438-19-7   | 4.63 | 4.17    | 4.53  | 4.63 | 4.10 | 4.50 | 3.93 | 4.25 |
| 626-98-2    | 4.69 | 3.98    | 4.59  | 4.65 | 4.14 | 4.58 | 4.15 | 4.03 |
| 10375-04-9  | 4.70 | 8.22    | 4.65  | 5.17 | 5.44 | 4.63 | 5.37 | 7.03 |
| 6996-92-5   | 4.79 | n/a     | n/a   | 4.97 | 4.73 | 4.84 | 4.66 | 5.80 |
| 100043-29-6 | 4.84 | 5.40    | 6.88  | 2.50 | 4.02 | 3.48 | 4.42 | 3.07 |
| 273-39-2    | 4.88 | 6.45    | 5.36  | 5.50 | 5.33 | 5.35 | 4.99 | 5.55 |
| 89123-36-4  | 4.89 | 10.70   | 4.85  | 4.84 | 5.03 | 4.26 | 4.78 | 6.83 |
| 1885-22-9   | 5.00 | n/a     | n/a   | 6.63 | 6.59 | 6.98 | 4.75 | 5.81 |

| CAS No.     | exp. | MolGpKa | OPERA | IGC  |      | SGC  |      | SGCN  |
|-------------|------|---------|-------|------|------|------|------|-------|
|             |      |         |       | MAP  | IAP  | MAP  | IAP  | MAP   |
| 75-98-9     | 5.04 | 4.18    | 4.94  | 4.71 | 4.05 | 4.83 | 5.19 | 5.05  |
| 69084-03-3  | 5.06 | 6.03    | 5.16  | 6.87 | 6.42 | 6.36 | 5.37 | 6.89  |
| 79100-71-3  | 5.15 | 6.82    | 5.27  | 2.11 | 4.49 | 4.30 | 6.88 | 5.17  |
| 52662-66-5  | 5.20 | 8.21    | 5.31  | 8.13 | 7.63 | 8.03 | 8.70 | 9.97  |
| 67465-26-3  | 5.25 | n/a     | n/a   | 5.00 | 4.78 | 5.02 | 4.66 | 5.52  |
| 600-40-8    | 5.28 | n/a     | n/a   | 5.25 | 5.41 | 5.74 | 5.44 | 5.25  |
| 127-73-1    | 5.46 | 6.04    | 6.26  | 6.98 | 6.52 | 7.29 | 6.63 | 7.36  |
| 5858-17-3   | 5.48 | 5.59    | 5.38  | 5.67 | 5.73 | 5.73 | 5.13 | 7.46  |
| 6017-47-6   | 5.50 | n/a     | 5.56  | 5.60 | 5.85 | 5.70 | 5.84 | 5.95  |
| 6280-28-0   | 5.55 | 4.98    | 7.07  | 4.47 | 4.69 | 5.09 | 4.29 | 5.22  |
| 4636-39-9   | 5.64 | 6.23    | 6.35  | 8.13 | 8.91 | 6.92 | 8.77 | 7.63  |
| 64276-66-0  | 5.65 | 5.04    | 5.55  | 4.99 | 4.27 | 4.79 | 3.62 | 4.69  |
| 112989-11-4 | 5.70 | 4.12    | 5.80  | 5.34 | 4.56 | 5.53 | 5.60 | 8.58  |
| 2977-73-3   | 5.75 | 6.01    | 5.77  | 6.07 | 7.79 | 8.10 | 8.92 | 10.13 |
| 12770-97-7  | 5.84 | 6.46    | 6.27  | 5.74 | 6.03 | 5.99 | 5.81 | 2.93  |
| 1610-26-0   | 5.89 | n/a     | n/a   | 6.64 | 8.05 | 6.44 | 7.62 | 6.53  |
| 16699-12-0  | 5.91 | 5.84    | n/a   | 6.88 | 6.64 | 7.40 | 6.57 | 7.16  |
| 15084-15-8  | 5.96 | 5.98    | 6.02  | 5.90 | 5.93 | 6.44 | 4.95 | 5.96  |
| 6059-10-5   | 6.00 | n/a     | 5.90  | 6.62 | 5.76 | 5.26 | 5.77 | 5.16  |
| 97477-81-1  | 6.00 | 6.43    | 5.96  | 6.26 | 5.80 | 5.01 | 8.07 | 4.73  |
| 76076-35-2  | 6.13 | 4.91    | 4.38  | 6.21 | 6.34 | 6.40 | 5.14 | 7.67  |
| 882-32-6    | 6.15 | n/a     | 6.25  | 6.33 | 6.16 | 6.48 | 5.84 | 6.13  |
| 603-72-5    | 6.20 | 4.83    | 6.30  | 7.87 | 7.87 | 6.19 | 6.65 | 5.89  |
| 515-67-3    | 6.23 | 7.45    | 7.79  | 7.47 | 8.27 | 7.45 | 7.74 | 7.26  |
| 15084-16-9  | 6.28 | 6.01    | 6.38  | 6.32 | 6.48 | 6.57 | 4.89 | 6.18  |
| 14832-59-8  | 6.30 | 9.35    | n/a   | 5.34 | 4.63 | 5.17 | 4.33 | 5.78  |

| CAS No.     | exp. | MolGpKa | OPERA | IGC  |      | SGC  |      | SGCN |
|-------------|------|---------|-------|------|------|------|------|------|
|             |      |         |       | MAP  | IAP  | MAP  | IAP  | MAP  |
| 118090-08-7 | 6.33 | 7.59    | 6.43  | 8.10 | 9.49 | 7.70 | 8.70 | 9.40 |
| 7693-52-9   | 6.36 | 6.19    | 6.26  | 6.27 | 6.49 | 6.22 | 6.17 | 6.36 |
| 93079-57-3  | 6.38 | 6.48    | 6.28  | 6.55 | 5.86 | 5.99 | 8.07 | 5.82 |
| 15570-12-4  | 6.39 | 6.08    | 7.25  | 6.39 | 6.34 | 6.40 | 5.82 | 6.16 |
| 89295-61-4  | 6.42 | 5.68    | 6.32  | 6.50 | 6.67 | 6.38 | 6.18 | 4.00 |
| 3182-75-0   | 6.48 | n/a     | 6.30  | 6.33 | 6.39 | 6.37 | 6.43 | 6.64 |
| 17103-51-4  | 6.50 | 5.40    | 6.40  | 6.91 | 6.14 | 5.90 | 5.09 | 6.00 |
| 17103-48-9  | 6.62 | 6.20    | 6.52  | 7.42 | 6.85 | 7.40 | 7.03 | 6.63 |
| 23045-32-1  | 6.63 | 8.37    | 6.60  | 8.52 | 8.15 | 9.09 | 8.39 | 9.47 |
| 885-82-5    | 6.73 | 6.75    | 7.44  | 6.52 | 7.31 | 7.01 | 6.97 | 7.32 |
| 5471-69-2   | 6.75 | n/a     | 6.85  | 6.74 | 6.22 | 6.60 | 5.84 | 6.76 |
| 13442-05-2  | 6.76 | 10.85   | 7.66  | 8.84 | 9.40 | 9.51 | 9.44 | 9.66 |
| 3251-56-7   | 6.83 | 5.73    | 6.93  | 6.96 | 6.39 | 6.60 | 8.42 | 8.16 |
| 2036-13-7   | 6.88 | 8.59    | 6.98  | 6.62 | 8.75 | 6.51 | 9.32 | 6.78 |
| 80-37-5     | 6.91 | 6.66    | 7.01  | 7.42 | 7.60 | 7.62 | 7.46 | 5.99 |
| 10452-78-5  | 6.92 | 5.84    | 7.53  | 8.04 | 8.91 | 8.31 | 9.23 | 8.30 |
| 58851-99-3  | 7.02 | 6.89    | 7.12  | 6.84 | 5.99 | 7.08 | 8.20 | 7.20 |
| 23045-33-2  | 7.05 | 7.97    | 7.15  | 9.55 | 8.22 | 8.80 | 8.53 | 9.12 |
| 515-59-3    | 7.12 | 5.69    | 7.02  | 6.76 | 6.46 | 7.02 | 5.93 | 7.20 |
| 100-02-7    | 7.13 | 6.61    | 7.06  | 6.99 | 6.53 | 7.02 | 8.59 | 7.34 |
| 24067-17-2  | 7.15 | n/a     | 3.86  | 8.36 | 9.02 | 8.33 | 8.80 | 9.12 |
| 2423-71-4   | 7.22 | 5.83    | 7.12  | 7.37 | 7.76 | 7.61 | 9.56 | 7.98 |
| 13331-27-6  | 7.30 | n/a     | 4.63  | 7.55 | 8.23 | 8.34 | 8.77 | 9.18 |
| 269727-10-8 | 7.31 | n/a     | 7.21  | 8.26 | 8.87 | 7.03 | 8.68 | 8.05 |
| 2268-11-3   | 7.35 | 9.18    | 7.25  | 7.62 | 8.77 | 7.72 | 7.96 | 5.43 |
| 6665-86-7   | 7.39 | 6.64    | 7.49  | 7.96 | 6.98 | 8.07 | 8.12 | 7.86 |



| CAS No.     | exp. | MolGpKa | OPERA | IGC  |      | SGC  |      | SGCN  |
|-------------|------|---------|-------|------|------|------|------|-------|
|             |      |         |       | MAP  | IAP  | MAP  | IAP  | MAP   |
| 635-93-8    | 7.40 | 7.07    | 7.42  | 7.82 | 7.74 | 7.48 | 7.41 | 7.95  |
| 57-68-1     | 7.44 | 11.27   | 7.54  | 6.53 | 6.37 | 6.67 | 6.70 | 7.06  |
| 6958-78-7   | 7.46 | 7.15    | 8.10  | 6.52 | 6.79 | 8.42 | 6.64 | 7.41  |
| 74537-62-5  | 7.48 | 8.49    | n/a   | 7.32 | 8.74 | 8.09 | 9.16 | 8.62  |
| 609-22-3    | 7.60 | 6.81    | 7.70  | 7.31 | 7.35 | 7.41 | 6.45 | 9.16  |
| 163136-69-4 | 7.60 | 6.53    | 7.50  | 8.06 | 6.50 | 7.37 | 8.57 | 6.65  |
| 91753-33-2  | 7.63 | 7.34    | 7.53  | 6.22 | 6.54 | 6.43 | 7.45 | 8.58  |
| 70661-86-8  | 7.64 | 7.42    | 7.74  | 7.92 | 7.47 | 7.86 | 9.65 | 8.21  |
| 20513-25-1  | 7.65 | 11.13   | 7.75  | 8.50 | 7.63 | 9.48 | 9.82 | 8.49  |
| 33426-53-8  | 7.67 | 7.03    | 7.77  | 8.58 | 8.82 | 8.85 | 9.51 | 8.61  |
| 38397-07-8  | 7.69 | 8.73    | 7.83  | 8.11 | 8.35 | 8.18 | 8.90 | 8.02  |
| 6953-61-3   | 7.70 | 7.97    | n/a   | 8.76 | 8.29 | 8.75 | 8.30 | 9.36  |
| 80348-66-9  | 7.75 | 6.52    | 7.65  | 7.48 | 9.92 | 7.80 | 7.28 | 8.29  |
| 615-58-7    | 7.77 | 6.72    | 8.14  | 7.45 | 7.44 | 7.17 | 6.55 | 9.02  |
| 6468-96-8   | 7.80 | 7.05    | 7.70  | 7.11 | 7.18 | 7.77 | 8.21 | 7.66  |
| 4427-22-9   | 7.82 | 8.02    | 7.72  | 8.33 | 8.41 | 8.30 | 8.31 | 7.75  |
| 5978-34-7   | 7.86 | 8.59    | 9.22  | 8.14 | 8.46 | 7.85 | 8.55 | 7.96  |
| 769-79-9    | 7.89 | 7.82    | 8.10  | 7.73 | 7.96 | 7.29 | 8.77 | 7.67  |
| 7467-91-6   | 7.92 | 7.46    | 8.02  | 8.47 | 7.95 | 8.29 | 8.20 | 8.58  |
| 7454-47-9   | 7.98 | 7.32    | 8.08  | 8.04 | 8.10 | 7.82 | 7.94 | 7.95  |
| 14452-34-7  | 7.98 | 6.52    | 7.88  | 7.38 | 7.91 | 7.31 | 7.56 | 7.01  |
| 71288-96-5  | 8.00 | 8.31    | 8.10  | 8.89 | 8.66 | 8.86 | 7.85 | 8.41  |
| 6089-66-3   | 8.01 | 8.56    | 8.11  | 7.77 | 8.49 | 7.40 | 8.80 | 7.09  |
| 85-87-0     | 8.02 | 9.16    | n/a   | 9.19 | 9.52 | 9.31 | 9.06 | 10.68 |
| 2446-50-6   | 8.07 | 8.41    | n/a   | 8.66 | 8.25 | 8.93 | 8.73 | 7.73  |
| 4776-14-1   | 8.09 | 9.72    | n/a   | 9.51 | 9.95 | 9.29 | 9.81 | 9.39  |

| CAS No.     | exp. | MolGpKa | OPERA | IGC  |      | SGC  |      | SGCN  |
|-------------|------|---------|-------|------|------|------|------|-------|
|             |      |         |       | MAP  | IAP  | MAP  | IAP  | MAP   |
| 79-15-2     | 8.10 | 5.57    | 8.57  | 8.10 | 7.39 | 7.95 | 7.30 | 8.39  |
| 52515-76-1  | 8.12 | 8.39    | 8.22  | 8.43 | 7.65 | 8.54 | 8.63 | 9.28  |
| 13704-50-2  | 8.14 | 8.92    | 8.07  | 8.70 | 8.50 | 8.60 | 8.45 | 10.06 |
| 70027-43-9  | 8.20 | 5.29    | 8.10  | 7.40 | 6.61 | 7.88 | 5.77 | 7.77  |
| 79100-69-9  | 8.20 | 6.71    | 8.45  | 4.47 | 8.27 | 8.85 | 7.76 | 7.38  |
| 139097-73-7 | 8.25 | 8.54    | 8.35  | 7.82 | 8.51 | 8.09 | 9.63 | 7.59  |
| 5344-97-8   | 8.25 | 5.28    | 8.11  | 8.06 | 8.15 | 8.05 | 8.77 | 8.43  |
| 18362-30-6  | 8.26 | 5.73    | 7.96  | 7.22 | 6.95 | 7.88 | 7.41 | 7.57  |
| 4198-90-7   | 8.27 | 7.49    | 8.37  | 8.14 | 9.13 | 8.25 | 9.70 | 8.01  |
| 85403-59-4  | 8.30 | 8.11    | 8.20  | 8.51 | 8.19 | 8.73 | 8.84 | 9.14  |
| 17056-96-1  | 8.34 | 8.81    | 8.24  | 8.64 | 7.97 | 9.06 | 8.33 | 8.18  |
| 27761-48-4  | 8.36 | 8.41    | 8.05  | 7.09 | 7.73 | 8.11 | 8.53 | 7.64  |
| 27556-51-0  | 8.39 | 8.11    | 9.54  | 8.66 | 8.64 | 8.70 | 8.59 | 8.61  |
| 37790-28-6  | 8.44 | 8.04    | 8.54  | 8.64 | 8.68 | 8.68 | 8.67 | 9.72  |
| 68-34-8     | 8.46 | 7.76    | 8.56  | 8.52 | 8.51 | 8.48 | 8.02 | 8.88  |
| 2216-93-5   | 8.50 | 8.57    | 8.40  | 9.30 | 8.46 | 8.57 | 8.51 | 7.31  |
| 95-77-2     | 8.58 | 7.96    | 8.69  | 8.40 | 7.43 | 8.59 | 7.70 | 7.76  |
| 6311-65-5   | 8.63 | 7.96    | 8.11  | 8.56 | 8.81 | 8.56 | 8.00 | 8.97  |
| 604-44-4    | 8.64 | 8.72    | 9.00  | 8.75 | 8.54 | 8.77 | 8.13 | 8.66  |
| 1146-41-4   | 8.66 | 7.80    | 8.67  | 8.57 | 8.23 | 8.61 | 7.98 | 8.93  |
| 89-40-7     | 8.68 | 10.00   | 8.78  | 7.68 | 8.36 | 8.06 | 8.42 | 6.25  |
| 481-13-0    | 8.70 | 8.70    | 8.60  | 7.92 | 7.55 | 7.70 | 7.77 | 7.66  |
| 131060-07-6 | 8.70 | 9.25    | 8.60  | 9.05 | 7.70 | 7.76 | 7.73 | 9.56  |
| 87-64-9     | 8.70 | 8.31    | 8.80  | 8.38 | 8.37 | 8.85 | 8.30 | 8.32  |
| 122231-61-2 | 8.71 | 7.97    | n/a   | 8.76 | 8.52 | 8.85 | 8.33 | 8.18  |
| 98-80-6     | 8.74 | n/a     | 7.94  | 9.88 | 9.00 | 8.66 | 8.82 | 10.01 |

| CAS No.    | exp. | MolGpKa | OPERA | IGC   |      | SGC   |      | SGCN  |
|------------|------|---------|-------|-------|------|-------|------|-------|
|            |      |         |       | MAP   | IAP  | MAP   | IAP  | MAP   |
| 7405-23-4  | 8.77 | 7.47    | 8.67  | 8.55  | 8.14 | 8.49  | 7.90 | 8.66  |
| 17056-99-4 | 8.80 | 7.96    | 8.21  | 8.78  | 8.18 | 8.72  | 8.42 | 8.78  |
| 367-12-4   | 8.81 | 8.24    | 9.17  | 8.53  | 8.75 | 8.66  | 8.02 | 8.27  |
| 103-87-7   | 8.83 | 9.66    | 8.93  | 10.03 | 9.59 | 9.66  | 9.11 | 9.78  |
| 2993-20-6  | 8.87 | 8.45    | 8.77  | 8.48  | 8.48 | 8.90  | 8.07 | 7.22  |
| 2446-51-7  | 8.89 | 7.59    | 8.79  | 10.86 | 5.68 | 11.54 | 7.53 | 9.04  |
| 78564-54-2 | 8.90 | 9.52    | n/a   | 8.85  | 8.81 | 8.82  | 9.41 | 7.44  |
| 77456-53-2 | 8.91 | 9.66    | 8.81  | 8.95  | 9.21 | 8.70  | 9.41 | 8.06  |
| 7385-87-7  | 8.94 | 8.45    | 8.84  | 8.61  | 8.38 | 8.93  | 8.34 | 9.11  |
| 58-56-0    | 8.98 | 9.14    | 9.08  | 9.49  | 9.22 | 9.14  | 9.10 | 9.92  |
| 17260-71-8 | 9.04 | 8.82    | 8.94  | 8.89  | 9.40 | 9.25  | 9.20 | 8.96  |
| 6665-83-4  | 9.09 | 6.93    | 9.19  | 8.87  | 8.46 | 8.81  | 8.15 | 8.90  |
| 4463-42-7  | 9.12 | n/a     | 9.02  | 10.03 | 9.89 | 9.94  | 9.17 | 10.42 |
| 53059-30-6 | 9.14 | 8.75    | 8.57  | 8.81  | 9.14 | 9.03  | 9.02 | 9.30  |
| 89415-43-0 | 9.17 | 11.88   | 9.07  | 9.55  | 9.08 | 9.56  | 8.82 | 10.00 |
| 2039-66-9  | 9.19 | 9.95    | 9.09  | 10.09 | 9.69 | 9.71  | 9.54 | 9.82  |
| 37432-20-5 | 9.20 | 10.07   | 8.69  | 9.46  | 9.56 | 9.58  | 9.53 | 9.13  |
| 571-60-8   | 9.25 | 7.96    | 8.99  | 9.75  | 9.27 | 9.72  | 8.85 | 9.79  |
| 588-05-6   | 9.27 | 9.60    | 9.85  | 9.57  | 9.30 | 9.96  | 9.20 | 9.81  |
| 77-67-8    | 9.34 | 9.58    | 9.18  | 9.51  | 9.29 | 9.49  | 8.34 | 6.70  |
| 20296-09-7 | 9.36 | 10.05   | 9.46  | 9.35  | 9.65 | 9.60  | 9.96 | 7.14  |
| 59-50-7    | 9.40 | 9.55    | 9.50  | 9.37  | 8.82 | 9.30  | 8.35 | 9.24  |
| 5374-12-9  | 9.43 | 7.91    | 7.11  | 9.05  | 8.65 | 8.20  | 8.30 | 7.88  |
| 3463-03-4  | 9.47 | 9.82    | 9.37  | 8.55  | 8.79 | 9.25  | 8.76 | 9.48  |
| 7147-90-2  | 9.48 | 10.03   | 9.58  | 9.07  | 8.87 | 8.73  | 8.18 | 6.17  |
| 103-90-2   | 9.50 | 9.30    | n/a   | 9.69  | 9.14 | 9.58  | 8.90 | 9.73  |

| CAS No.     | exp.  | MolGpKa | OPERA | IGC   |       | SGC   |       | SGCN  |
|-------------|-------|---------|-------|-------|-------|-------|-------|-------|
|             |       |         |       | MAP   | IAP   | MAP   | IAP   | MAP   |
| 584-43-0    | 9.59  | 9.47    | 7.90  | 9.42  | 8.66  | 8.96  | 8.30  | 6.25  |
| 5111-66-0   | 9.64  | 9.08    | 9.74  | 9.62  | 9.18  | 9.54  | 8.90  | 9.63  |
| 89466-06-8  | 9.64  | n/a     | n/a   | 9.04  | 8.87  | 8.43  | 8.51  | 9.11  |
| 84452-98-2  | 9.66  | 8.96    | 8.47  | 8.95  | 9.17  | 9.13  | 8.30  | 7.73  |
| 3566-61-8   | 9.70  | 9.73    | 9.60  | 9.54  | 8.96  | 5.92  | 8.45  | 4.67  |
| 487-93-4    | 9.73  | 9.57    | 9.63  | 9.97  | 9.40  | 9.84  | 8.77  | 9.97  |
| 70460-18-3  | 9.75  | 8.85    | 9.15  | 8.58  | 8.98  | 8.67  | 8.83  | 9.04  |
| 2937-60-2   | 9.77  | 11.70   | 9.89  | 9.68  | 9.22  | 9.34  | 9.15  | 9.89  |
| 124603-61-8 | 9.80  | 10.56   | 9.70  | 10.70 | 9.96  | 9.89  | 8.87  | 6.48  |
| 6244-77-5   | 9.81  | 9.57    | 9.91  | 10.09 | 10.81 | 9.93  | 10.72 | 10.37 |
| 154286-35-8 | 9.85  | 9.67    | 9.32  | 9.76  | 9.30  | 9.92  | 8.92  | 10.00 |
| 10319-77-4  | 9.89  | 7.62    | 9.80  | 9.54  | 10.96 | 8.85  | 11.20 | 9.57  |
| 613-14-9    | 9.92  | 9.32    | 9.38  | 8.74  | 8.91  | 9.27  | 8.90  | 9.72  |
| 91-04-3     | 9.92  | 11.60   | 9.42  | 9.65  | 8.80  | 9.48  | 9.35  | 9.81  |
| 127351-11-5 | 9.96  | 9.31    | 9.86  | 9.77  | 9.98  | 10.14 | 10.18 | 10.05 |
| 61-67-6     | 9.98  | 9.39    | 9.88  | 9.35  | 9.70  | 9.65  | 9.33  | 8.80  |
| 3144-47-6   | 10.00 | 6.20    | 6.90  | 7.27  | 7.85  | 5.99  | 7.61  | 7.32  |
| 28128-30-5  | 10.00 | 9.92    | 10.10 | 10.37 | 9.78  | 10.10 | 9.58  | 8.63  |
| 34420-17-2  | 10.00 | n/a     | 9.90  | 9.38  | 10.07 | 9.31  | 9.37  | 9.98  |
| 27289-33-4  | 10.01 | 9.63    | 10.19 | 10.04 | 9.30  | 10.10 | 9.25  | 9.88  |
| 26074-38-4  | 10.03 | 7.97    | 10.16 | 10.01 | 5.74  | 9.68  | 8.84  | 8.65  |
| 826-81-3    | 10.08 | 9.52    | 9.98  | 9.81  | 8.94  | 9.63  | 8.80  | 9.35  |
| 698-71-5    | 10.10 | 11.20   | 10.42 | 10.04 | 9.48  | 9.88  | 9.28  | 9.95  |
| 108-68-9    | 10.13 | 10.97   | 10.11 | 10.22 | 9.47  | 9.83  | 9.30  | 10.12 |
| 127351-05-7 | 10.18 | 9.65    | 10.17 | 9.98  | 10.17 | 10.19 | 10.08 | 10.07 |
| 1641-41-4   | 10.20 | 8.73    | 10.10 | 10.24 | 9.44  | 10.29 | 9.65  | 9.92  |

| CAS No.     | exp.  | MolGpKa | OPERA | IGC   |       | SGC   |       | SGCN  |
|-------------|-------|---------|-------|-------|-------|-------|-------|-------|
|             |       |         |       | MAP   | IAP   | MAP   | IAP   | MAP   |
| 7343-35-3   | 10.22 | 11.10   | n/a   | 12.66 | 11.16 | 12.27 | 11.51 | 9.89  |
| 122-94-1    | 10.23 | 10.11   | 10.13 | 10.09 | 9.49  | 10.06 | 8.79  | 9.93  |
| 622-62-8    | 10.23 | 10.12   | 10.33 | 10.05 | 9.46  | 9.95  | 8.80  | 9.92  |
| 14531-55-6  | 10.27 | 11.37   | 10.37 | 8.88  | 10.09 | 9.16  | 11.38 | 8.12  |
| 914296-27-8 | 10.30 | 10.93   | 10.37 | 10.92 | 10.84 | 10.17 | 11.06 | 9.82  |
| 90045-28-6  | 10.30 | 7.97    | 8.90  | 8.78  | 8.03  | 8.86  | 8.05  | 9.64  |
| 95-65-8     | 10.32 | 10.16   | 10.44 | 10.12 | 9.72  | 10.11 | 9.23  | 10.03 |
| 56768-47-9  | 10.35 | 10.14   | 10.25 | 10.00 | 9.86  | 10.07 | 9.99  | 8.96  |
| 3594-88-5   | 10.40 | 9.64    | 9.69  | 9.07  | 8.92  | 8.58  | 9.10  | 9.64  |
| 103-16-2    | 10.47 | 10.10   | 10.37 | 10.06 | 9.43  | 9.97  | 8.79  | 9.89  |
| 22440-82-0  | 10.50 | 9.44    | 9.67  | 9.76  | 10.00 | 9.79  | 9.03  | 9.74  |
| 854706-73-3 | 10.54 | 9.77    | 10.64 | 9.97  | 9.40  | 9.83  | 9.09  | 10.04 |
| 496-78-6    | 10.55 | 10.21   | 10.65 | 10.70 | 10.14 | 10.29 | 9.70  | 10.07 |
| 5919-26-6   | 10.60 | 11.55   | n/a   | 10.64 | 7.90  | 10.33 | 5.12  | 6.30  |
| 91967-91-8  | 10.61 | 11.13   | 10.67 | 9.96  | 9.93  | 9.74  | 9.66  | 9.90  |
| 56577-68-5  | 10.70 | n/a     | n/a   | 9.53  | 9.87  | 9.21  | 10.34 | 10.61 |
| 6244-75-3   | 10.76 | 9.87    | 10.66 | 10.63 | 10.71 | 10.82 | 10.69 | 10.57 |
| 3144-09-0   | 10.80 | 9.13    | 9.09  | 9.72  | 9.86  | 10.08 | 9.94  | 8.74  |
| 74926-85-5  | 10.82 | 10.63   | 10.93 | 10.88 | 10.16 | 10.49 | 9.61  | 9.97  |
| 20484-31-5  | 10.84 | 10.38   | n/a   | 10.87 | 9.81  | 10.64 | 9.37  | 10.05 |
| 3228-04-4   | 10.85 | 10.74   | 10.80 | 10.22 | 10.26 | 10.33 | 10.10 | 10.18 |
| 636-04-4    | 10.86 | 10.17   | 10.83 | 10.71 | 10.81 | 10.89 | 10.73 | 10.64 |
| 170245-15-5 | 10.88 | 10.92   | 11.93 | 10.52 | 10.84 | 9.59  | 10.95 | 9.20  |
| 10569-71-8  | 10.90 | 10.89   | 10.70 | 10.66 | 10.35 | 10.49 | 10.09 | 10.25 |
| 127351-04-6 | 10.95 | 10.20   | 10.85 | 10.54 | 10.13 | 10.76 | 10.40 | 10.49 |
| 120-65-0    | 10.96 | 10.00   | 9.63  | 9.86  | 9.57  | 9.63  | 9.39  | 9.93  |

| CAS No.     | exp.  | MolGpKa | OPERA | IGC   |       | SGC   |       | SGCN  |
|-------------|-------|---------|-------|-------|-------|-------|-------|-------|
|             |       |         |       | MAP   | IAP   | MAP   | IAP   | MAP   |
| 127351-08-0 | 10.99 | 9.89    | 10.89 | 10.75 | 10.36 | 10.90 | 10.52 | 10.53 |
| 7684-18-6   | 11.00 | 11.13   | 9.44  | 9.20  | 8.16  | 9.38  | 9.43  | 9.18  |
| 95236-95-6  | 11.18 | 10.18   | 11.08 | 10.62 | 10.69 | 10.91 | 10.68 | 10.58 |
| 13207-66-4  | 11.24 | 10.54   | 10.65 | 8.73  | 9.00  | 8.65  | 8.60  | 9.46  |
| 95236-94-5  | 11.26 | 10.25   | 11.34 | 10.88 | 10.61 | 11.05 | 10.64 | 10.57 |
| 942-32-5    | 11.30 | 12.27   | n/a   | 11.14 | 10.93 | 11.72 | 11.43 | 10.06 |
| 5326-80-7   | 11.30 | 10.46   | n/a   | 10.60 | 10.27 | 10.43 | 10.09 | 9.70  |
| 5310-26-9   | 11.36 | 10.50   | 11.71 | 10.97 | 10.83 | 11.17 | 10.68 | 10.60 |
| 23562-77-8  | 11.48 | 10.43   | n/a   | 10.78 | 9.79  | 10.73 | 9.08  | 9.98  |
| 3031-73-0   | 11.50 | 10.77   | 11.40 | 11.72 | 11.39 | 11.43 | 10.56 | 11.03 |
| 119059-70-0 | 11.53 | 9.93    | 11.43 | 10.22 | 9.95  | 8.51  | 9.98  | 9.84  |
| 637-53-6    | 11.56 | 9.75    | 11.41 | 10.88 | 11.11 | 10.87 | 11.50 | 11.05 |
| 55252-75-0  | 11.77 | 8.81    | 10.43 | 9.71  | 9.89  | 9.93  | 9.52  | 9.67  |
| 97317-28-7  | 11.81 | 10.56   | 11.62 | 11.29 | 10.92 | 11.61 | 10.71 | 10.55 |
| 34535-90-5  | 11.91 | 12.00   | 11.59 | 12.36 | 11.68 | 12.55 | 11.86 | 10.11 |
| 19854-93-4  | 12.09 | 12.40   | 12.60 | 11.70 | 11.79 | 11.75 | 11.36 | 9.80  |
| 89267-19-6  | 12.10 | 12.87   | 11.75 | 13.05 | 12.24 | 13.90 | 12.91 | 11.90 |
| 14575-62-3  | 12.14 | 12.08   | 6.75  | 11.39 | 10.62 | 11.14 | 11.31 | 10.43 |
| 3696-23-9   | 12.30 | 9.23    | 11.74 | 10.60 | 10.13 | 10.34 | 7.47  | 8.55  |
| 2646-30-2   | 12.35 | 9.34    | 12.25 | 10.33 | 9.72  | 10.17 | 8.11  | 9.00  |
| 582-60-5    | 12.52 | 12.09   | n/a   | 12.86 | 12.24 | 12.99 | 11.79 | 11.52 |
| 128-37-0    | 12.55 | 9.98    | 11.80 | 10.41 | 10.33 | 9.93  | 9.79  | 10.09 |
| 80-15-9     | 12.64 | 11.10   | 12.37 | 10.95 | 10.80 | 10.86 | 10.88 | 10.20 |
| 19322-71-5  | 12.80 | 11.34   | 9.47  | 12.54 | 11.54 | 11.73 | 11.72 | 11.84 |
| 105868-53-9 | 13.10 | 11.01   | 7.69  | 11.85 | 11.24 | 11.84 | 11.83 | 10.95 |
| 116866-63-8 | 13.33 | 12.06   | n/a   | 12.88 | 12.12 | 12.89 | 11.72 | 11.52 |

| CAS No.     | exp.  | MolGpKa | OPERA | IGC   |       | SGC   |       | SGCN  |
|-------------|-------|---------|-------|-------|-------|-------|-------|-------|
|             |       |         |       | MAP   | IAP   | MAP   | IAP   | MAP   |
| 122992-92-1 | 13.46 | 14.41   | n/a   | 14.20 | 12.83 | 14.28 | 11.64 | 12.99 |
| 271-42-1    | 13.86 | 13.51   | 13.58 | 11.74 | 12.92 | 12.84 | 12.86 | 12.18 |
| 3589-73-9   | 14.54 | 14.72   | n/a   | 13.94 | 13.24 | 13.86 | 12.37 | 11.25 |
| 3073-77-6   | 14.70 | 11.38   | 10.72 | 11.31 | 16.05 | 10.34 | 13.24 | 7.47  |
| 42845-45-4  | 15.54 | 13.85   | 12.31 | 15.32 | 15.16 | 15.33 | 14.76 | 14.81 |
| 71-31-8     | 15.97 | 14.02   | 13.00 | 14.87 | 14.39 | 15.05 | 14.61 | 14.35 |
| 130190-71-5 | 16.65 | 9.85    | 8.12  | 9.45  | 9.91  | 8.66  | 9.24  | 8.70  |
